# Supplementary material for: A joint method for the screening of pharmacological chaperones for phenylalanine hydroxylase
Source: Royal Society of Chemistry journal article supplement (doi:10.1039/d1ob00638j), 2021-01-01
Supplement: d1ob00638j2.xlsx [file d1ob00638j2.xlsx]

## Sheet: Fig1A
	Fig1A	Standard Curve		Fig1B	Standard Curve
		Tyr(μM)	I(304)		Tyr(μM)	MS/MS
		0	8879		0	0.89
		62.5	9092		62.5	4.63
		125	9430		125	8.62
		250	10659		250	16.65
		500	12877		500	32.74
	Fig1C
	Fluorospectrophotometry	NC-1	NC-2	NC-3	PAH-1	PAH-2	PAH-3
	Y(I304)	8639.34	8639.3	8638.5	8671.46	8671.72	8671.29
	X	1.37546	1.37065	1.27447	5.23734	5.2686	5.2169
	X(average)	1.34019
	Quantification	1.02646	1.02288	0.951095	3.90846	3.93179	3.89321
	MS/MS	NC-1	NC-2	NC-3	PAH-1	PAH-2	PAH-3
	Y(I304)	4.36	4.27	4.01	115.86	119.93	120.51
	X	56.964	55.5556	51.4867	1801.88	1865.57	1874.65
	X(average)	54.6688
	Quantification	1.04196	1.0162	0.941772	32.9592	34.1242	34.2902
															qa

## Sheet: Fig2A
	Y(MS/MS)	X(actual Tyr)	average X	Quantification
NC	17.91	269.014	281.925	0.954205
NC	19.56	294.836		1.0458
24h	39.33	604.225		2.14321
24h	40.05	615.493		2.18318
48h	102.885	1598.83		5.67111
48h	104.535	1624.65		5.7627
60h	111.675	1736.38		6.15903
60h	102.255	1588.97		5.63614
72h	123.69	1924.41		6.82598
72h	127.41	1982.63		7.03247

## Sheet: Fig2B
	Y(MS/MS)	X(actual Tyr)	average X	Quantification
NC	121.03	1882.79		6.70436
NC	122.27	1902.19		6.77346
2ul	17.46	261.972	280.829	0.932848
2ul	19.87	299.687		1.06715
5ul	26.64	405.634		1.44441
5ul	27.81	423.944		1.50961
10ul	67.83	1050.23		3.73975
10ul	63.62	984.351		3.50515
20ul	108.13	1680.91		5.9855
20ul	101.92	1583.72		5.63944
40ul	110.27	1714.4		6.10475
40ul	109.72	1705.79		6.0741

## Sheet: Fig2C
	Y(MS/MS)	X(actual Tyr)	average X	Quantification
2h	42.36	651.643	648.044	1.00556
2h	41.9	644.444		0.994452
6h	78.91	1223.63		1.8882
6h	72.66	1125.82		1.73727
10h	97.19	1509.7		2.32964
10h	105.48	1639.44		2.52984

## Sheet: Fig2D
	Y(MS/MS)	X(actual Tyr)	average X	Quantification
0d	114.67	1783.26	1832.16	0.973308
0d	120.92	1881.06		1.02669
1d	89.44	1388.42		0.757805
1d	90.35	1402.66		0.765578
3d	81.77	1268.39		0.692291
3d	93.8	1456.65		0.795046
5d	56.58	874.178		0.47713
5d	52.53	810.798		0.442537
7d	34.41	527.23		0.287764
7d	36.14	554.304		0.302541

## Sheet: Fig2E
	Y(MS/MS)	X(actual Tyr)	average X	Quantification
4℃	105.07	1633.02	1634.04	0.999376
4℃	105.2	1635.05		1.00062
―20℃	62.95	973.865		0.595986
―20℃	62.42	965.571		0.59091
―70℃	46.35	714.085		0.437006
―70℃	47.28	728.638		0.445912

## Sheet: Fig3A
		Y(MS/MS)	X(actual Tyr)	average X	Quantification
NC-BH4	15 min-1	2.63	29.8905	29.421	1.01599
	15 min-2	2.57	28.9515		0.984075
	30 min-1	2.94	34.7418		1.18089
	30 min-2	3.04	36.3067		1.23408
	60 min-1	2.66	30.3599		1.03195
	60 min-2	2.75	31.7684		1.07982
	180min-1	2.64	30.0469		1.02131
	180min-2	2.65	30.2034		1.02663
PAH-BH4	15 min-1	2.69	30.8294		1.04791
	15 min-2	2.54	28.482		0.968117
	30 min-1	2.8	32.5509		1.10642
	30 min-2	2.75	31.7684		1.07982
	60 min-1	2.5	27.856		0.94684
	60 min-2	2.65	30.2034		1.02663
	180min-1	2.71	31.1424		1.05855
	180min-2	2.55	28.6385		0.973436
NC+BH4	15 min-1	2.57	28.9515		0.984075
	15 min-2	2.69	30.8294		1.04791
	30 min-1	3.04	36.3067		1.23408
	30 min-2	2.8	32.5509		1.10642
	60 min-1	2.75	31.7684		1.07982
	60 min-2	2.5	27.856		0.94684
	180min-1	2.64	30.0469		1.02131
	180min-2	2.71	31.1424		1.05855
PAH+BH4	15 min-1	52.58	811.581		27.586
	15 min-2	55.78	861.659		29.2882
	30 min-1	72.61	1125.04		38.2406
	30 min-2	76.31	1182.94		40.2088
	60 min-1	95.75	1487.17		50.5495
	60 min-2	94.63	1469.64		49.9538
	180min-1	144.44	2249.14		76.4493
	180min-2	144.63	2252.11		76.5504

## Sheet: Fig3B
		Y(MS/MS)	X(actual Tyr)	average X	Quantification
NC	15 min-1	2.07	21.1268	21.9092	0.964252
	15 min-2	2.17	22.6917		1.03568
PAH	15 min-1	32.19	492.488		22.4778
	15 min-2	33.84	518.31		23.6563
NC	30 min-1	1.89	18.3099		0.835685
	30 min-2	2.04	20.6573		0.942824
PAH	30 min-1	49.68	766.197		34.9702
	30 min-2	51.16	789.358		36.0273
NC	60 min-1	2.21	23.3177		1.06425
	60 min-2	2.08	21.2833		0.971395
PAH	60 min-1	63.5	982.473		44.8413
	60 min-2	64.12	992.175		45.2841
NC	180min-1	2.52	28.169		1.28567
	180min-2	2.35	25.5086		1.16424
PAH	180min-1	94.7	1470.74		67.1262
	180min-2	95.59	1484.66		67.7619

## Sheet: Fig3C
	BH4	Y(MS/MS)	X(actual Tyr)	average X	Quantification
NC	0μM-1	2.8	33.0159	35	0.943311
	0μM-2	3.05	36.9841		1.05669
PAH	0μM-1	2.75	32.2222		0.920635
	0μM-2	2.74	32.0635		0.9161
NC	50μM-1	2.92	34.9206		0.997732
	50μM-2	2.93	35.0794		1.00227
PAH	50μM-1	56.52	885.714		25.3061
	50μM-2	56.73	889.048		25.4014
NC	75μM-1	3.1	37.7778		1.07937
	75μM-2	2.85	33.8095		0.965986
PAH	75μM-1	57.48	900.952		25.7415
	75μM-2	57.62	903.175		25.805
NC	100μM-1	2.96	35.5556		1.01587
	100μM-2	2.85	33.8095		0.965986
PAH	100μM-1	54.99	861.429		24.6122
	100μM-2	58.37	915.079		26.1451
NC	200μM-1	2.85	33.8095		0.965986
	200μM-2	3.09	37.619		1.07483
PAH	200μM-1	47.45	741.746		21.1927
	200μM-2	47.36	740.317		21.1519

## Sheet: Fig5A
		Y(MS/MS)	X(actual Tyr)	average X	Quantification
ddH2O	0	95.01	1475.59	1547.26	0.953677
		104.17	1618.94		1.04632
	0.25%	93.11	1445.85		0.934459
		95.17	1478.09		0.955295
	0.50%	99.76	1549.92		1.00172
		98.07	1523.47		0.984626
	0.75%	95.3	1480.13		0.95661
		94.01	1459.94		0.943562
	1.00%	101.13	1571.36		1.01558
		98.01	1522.54		0.984019
DMSO	0	95.36	1481.06	1547.1	0.957313
		103.8	1613.15		1.04269
	0.25%	101.6	1578.72		1.02043
		94.86	1473.24		0.952256
	0.50%	98.03	1522.85		0.984321
		97.18	1509.55		0.975723
	0.75%	102.75	1596.71		1.03207
		96.04	1491.71		0.964192
	1.00%	103.83	1613.62		1.04299
		97.77	1518.78		0.981691

[truncated: 8 more sheets: Fig5B, Fig5C, Fig5D, Fig6A, Fig6B, Fig6C, Fig6D, Fig6E]
